# Supplementary material for: Neural correlates and structural markers of emotion dysregulation in traumatized civilians
Source: PubMed Central journal article supplement — Soc Cogn Affect Neurosci. 2017 Mar 1;12(5):823–31. doi: 10.1093/scan/nsx005 (PMC5460053; doi:10.1093/scan/nsx005), 2017-03-01
Supplement: nsx005_supp.pdf [file nsx005_supp.pdf]

## Supplemental Materials

**Structural MRI analysis.** The authors (SVR and JSS) visually examined all T1 images and segmentations for errors, and summary statistics and a summary of outliers  $\pm 3 SD$  from the mean were generated from the segmentation of each of 7 subcortical structures (nucleus accumbens, amygdala, caudate, hippocampus, pallidum, putamen, and thalamus). Regional volumes that were visually confirmed to contain a segmentation error were discarded<sup>1</sup>. For freesurfer's surface-based analysis, summary statistics and a summary of outliers  $\pm 3 SD$  from the mean were generated from the thickness and surface area values of regions defined by the Desikan Atlas (Desikan *et al.*, 2006). The authors (SVR and JSS) visually examined each subject's data from both internal (axial, coronal, and sagittal slices) and external views (3D rendering of surface) to identify surface reconstruction errors. Regions that were confirmed to contain an error were discarded<sup>2</sup>.

**PROCESS mediation model.** PROCESS allows for the examination of the mediating effects of a variable conditional on the effects of other variables in the model. PROCESS uses an ordinary least squares regression-based path analytic framework for estimating direct and indirect effects in a single mediator model. Bootstrapping with 95% confidence intervals (CI) was utilized to determine significance of mediation effects. Bootstrapping is a particularly useful method for interpreting mediation analyses because it does not assume that sampling distributions of the indirect effects are normally distributed (Preacher and Hayes, 2008).

---

<sup>1</sup> Within this sample, 1 participant was excluded from analyses with right amygdala volume data.

<sup>2</sup> Within this sample, 1 participant had missing left and right superior frontal surface area values, 2 had missing left dACC thickness values, 1 had missing right dACC thickness values, 1 had left and right rACC thickness values, and 1 had missing right medial orbitofrontal thickness values.

Supplemental Table 1

Correlations between Clusters and Psychiatric Outcomes

|                                   | <b>Cluster 1</b> | <b>Cluster 2</b> | <b>Cluster 3</b> | <b>Cluster 4</b> |
|-----------------------------------|------------------|------------------|------------------|------------------|
| PTSD symptom severity (PSS)       | 0.20             | 0.26*            | 0.11             | 0.14             |
| Depression symptom severity (BDI) | 0.18             | 0.26*            | 0.16             | 0.20             |

N=92; \* $p < .05$ ; \*\* $p < .01$

PTSD Symptom Scale (PSS); Beck Depression Inventory (BDI)
